# Supplementary material for: Graphene-supported binary active Mn0.25Co0.75O solid solution derived from a CoMn-layered double hydroxide precursor for highly improved lithium storage
Source: Royal Society of Chemistry journal article supplement (doi:10.1039/c6ra01500j), 2016-01-01
Supplement: c6ra01500j1.pdf [file c6ra01500j1.pdf]

## Electronic Supporting Information

### Graphene-supported binary active $\text{Mn}_{0.25}\text{Co}_{0.75}\text{O}$ solid solution derived from CoMn-layered double hydroxide precursor for highly improved lithium storage

Fen Wang, Shilin Zhang, Daxun Bai, Fazhi Zhang, Sailong Xu\*

*State Key Laboratory of Chemical Resource Engineering, Beijing University of Chemical Technology, Beijing 100029, China*

*Email: xusl@mail.buct.edu.cn*

**Figure S1**

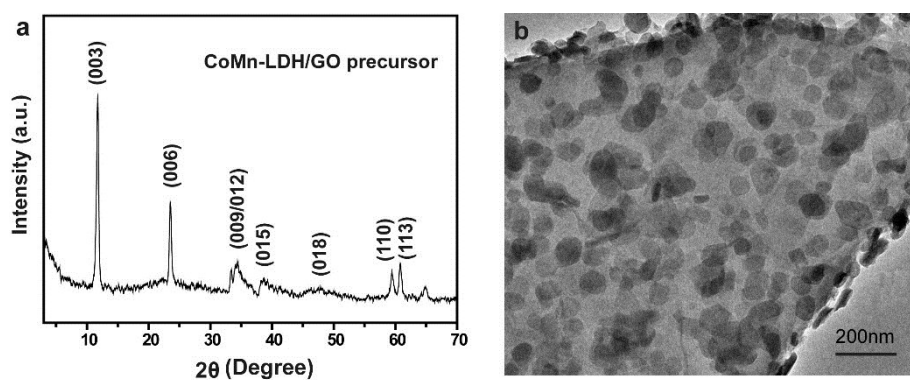

**Figure S1** (a) XRD patterns and (b) TEM image of CoMn-LDH/GO precursor.

**Figure S2**

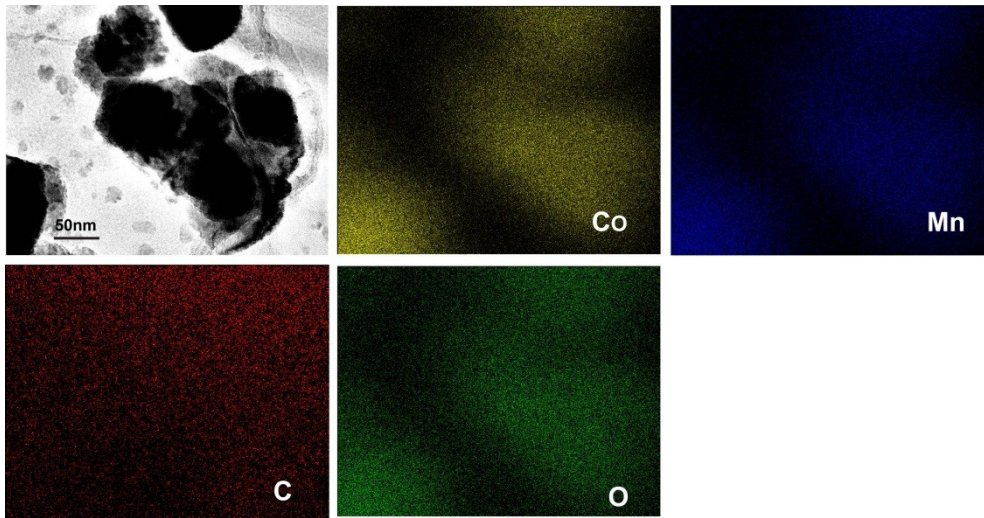

**Figure S2** The element mapping images of Co, Mn, O, and C elements of the  $\text{Mn}_{0.25}\text{Co}_{0.75}\text{O}/\text{G}$  composite.

Figure S3

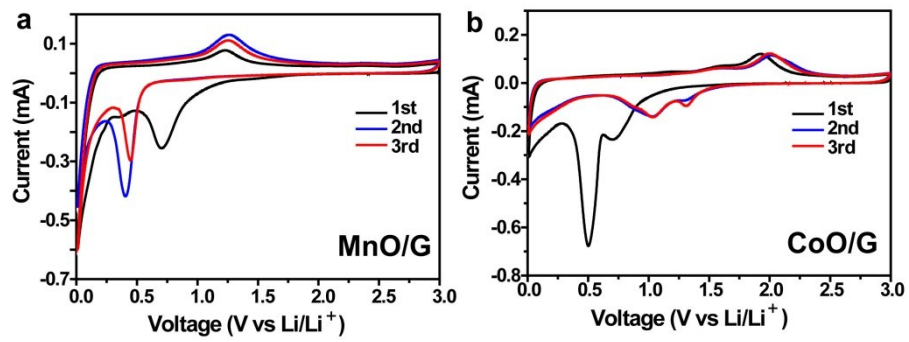

**Figure S3** The first three cyclic voltammograms curves of (a) MnO/G and (b) CoO/G between 0 and 3.0V at a scan rate of 0.1 mV s<sup>-1</sup>.

Figure S4

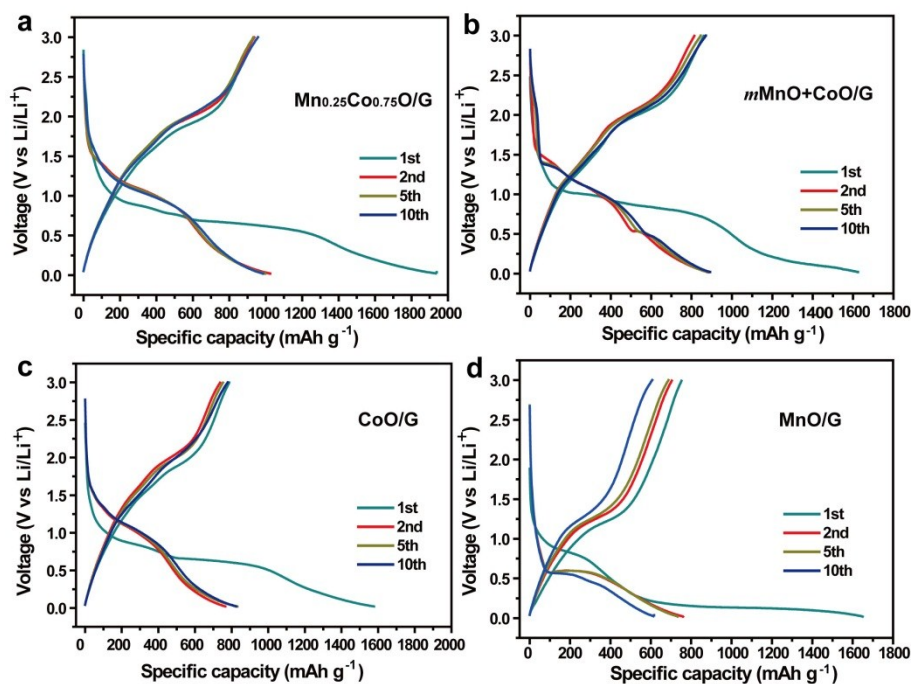

Figure S4 The charge/discharge profiles of (a) Mn<sub>0.25</sub>Co<sub>0.75</sub>O/G, (b) *m*CoO+MnO/G, (c) CoO/G, and (d) MnO/G between 0.01 and 3.0 V at a current density of 100 mA g<sup>-1</sup>.

**Table S1**

**Table S1** Comparison of specific capacities between the Co,Mn-containing TMO anode nanomaterials for LIBs.

| Anode nanomaterials                       | Current rate<br>(mA g <sup>-1</sup> ) | Cycle number | Specific Capacities<br>(mAh g <sup>-1</sup> ) | Ref.       |
|-------------------------------------------|---------------------------------------|--------------|-----------------------------------------------|------------|
| MnO-CoO ( $R_{Co}= 50$ )                  | 100                                   | 20           | 170                                           | 27         |
| CoMn <sub>2</sub> O <sub>4</sub>          | 100                                   | 100          | 325                                           | 37         |
| Co doped NiO                              | 0.1C                                  | 50           | 708                                           | 38         |
| Mn <sub>2</sub> CoO <sub>4</sub> /RGO     | 100                                   | 50           | 625                                           | 39         |
| Mn <sub>0.25</sub> Co <sub>0.75</sub> O/G | 100                                   | 100          | 980                                           | This study |
| CoMn <sub>2</sub> O <sub>4</sub> /C       | 1000                                  | 50           | 715                                           | 40         |
| MnCo <sub>2</sub> O <sub>4</sub>          | 1000                                  | 1000         | 740                                           | 41         |
| CoMn <sub>2</sub> O <sub>4</sub>          | 1000                                  | 1000         | 420                                           | 41         |
| Mn <sub>0.25</sub> Co <sub>0.75</sub> O/G | 2000                                  | 1300         | 1087                                          | This study |
